# Supplementary material for: Hypoxia-inducible factor 1 alpha limits dendritic cell stimulation of CD8 T cell immunity
Source: PubMed Central journal article supplement (PMC7775062; doi:10.1371/journal.pone.0244366), 2020-12-31
Supplement: pone.0244366.s006.pdf [file pone.0244366.s006.pdf]

Fig 1e: iNOS

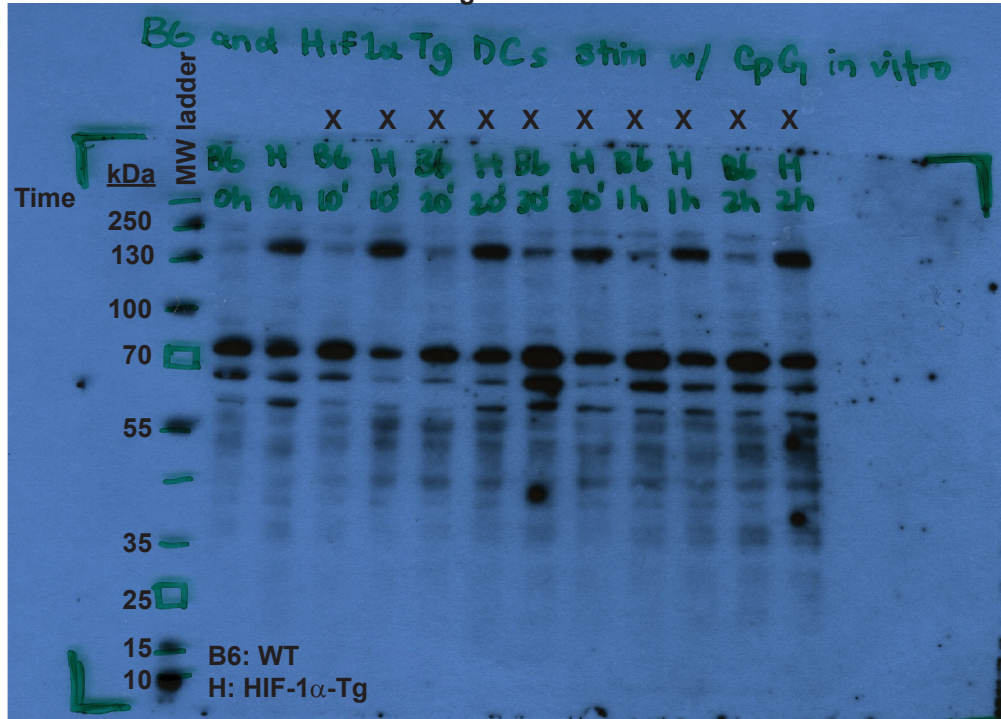

Fig 1e:  $\beta$ -actin

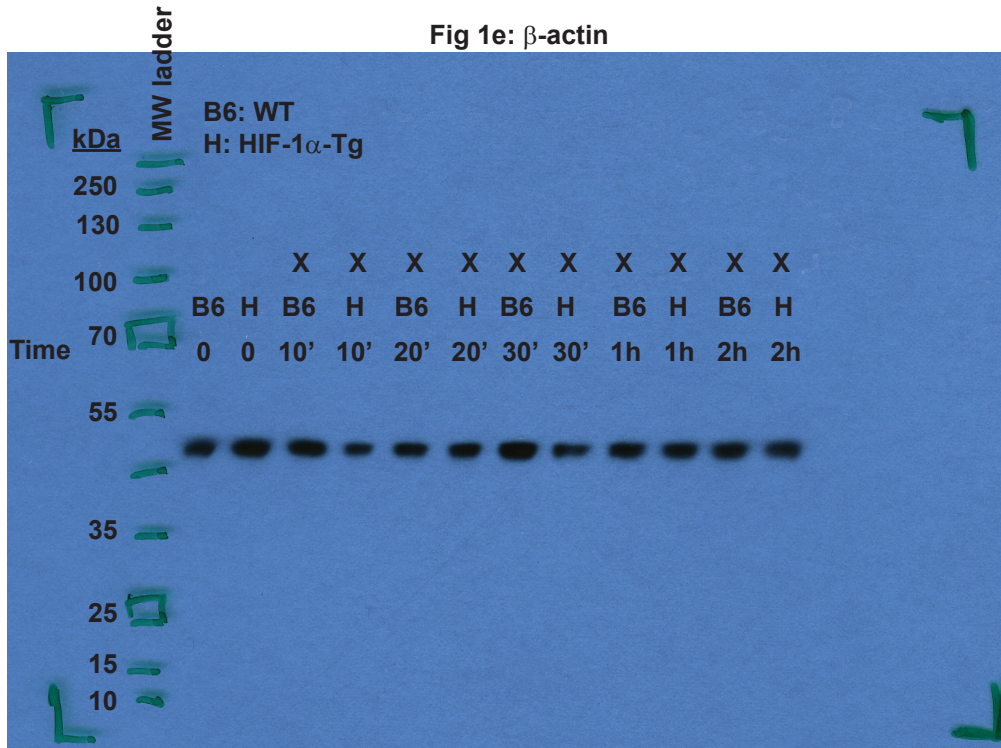

Images for Fig 1e were first captured on X-ray film after chemiluminescent development of the blot (Supersignal West Femto). Developed film was then scanned on a flatbed scanner to generate the digital images above.
